# Supplementary material
Source: HighWire-hosted journal article supplement (https://www.life-science-alliance.org/content/6/3/e202201722/F3)

Figure S1B

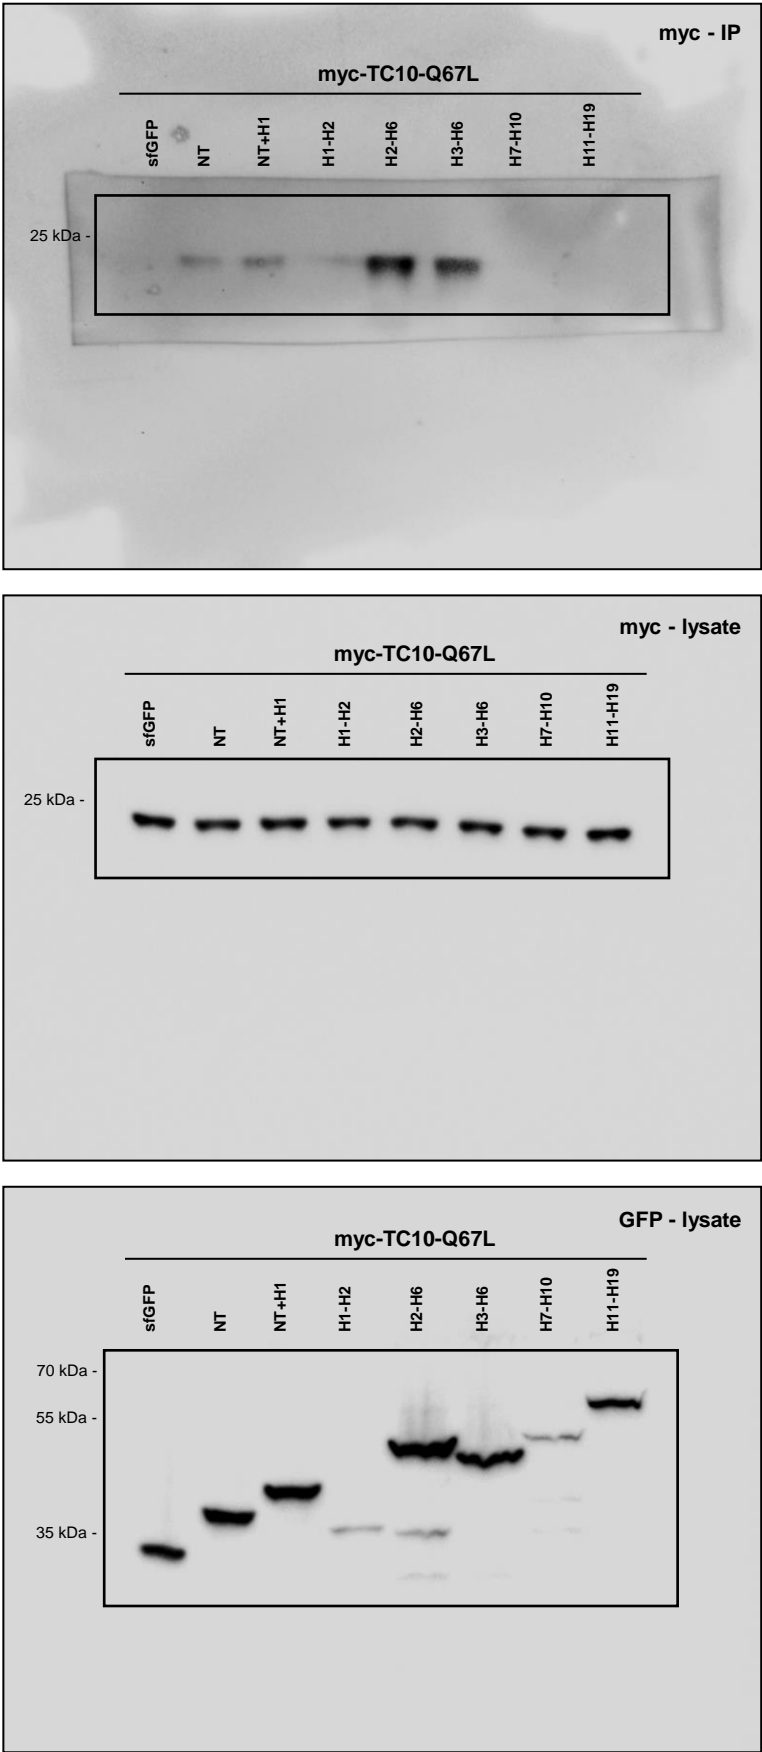

Figure S1C

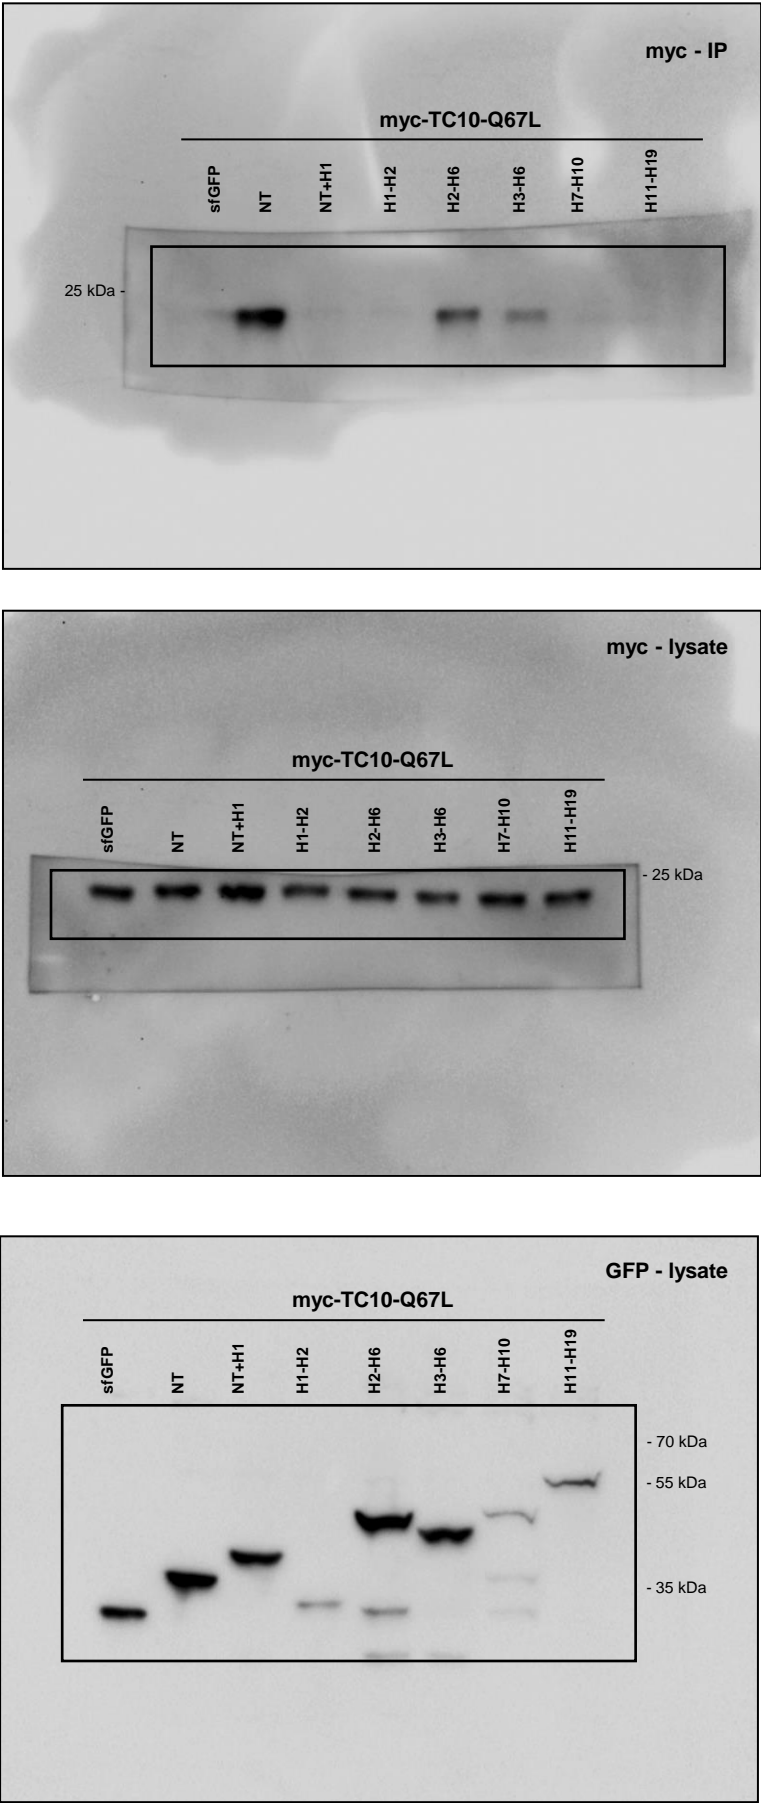

Figure S1D

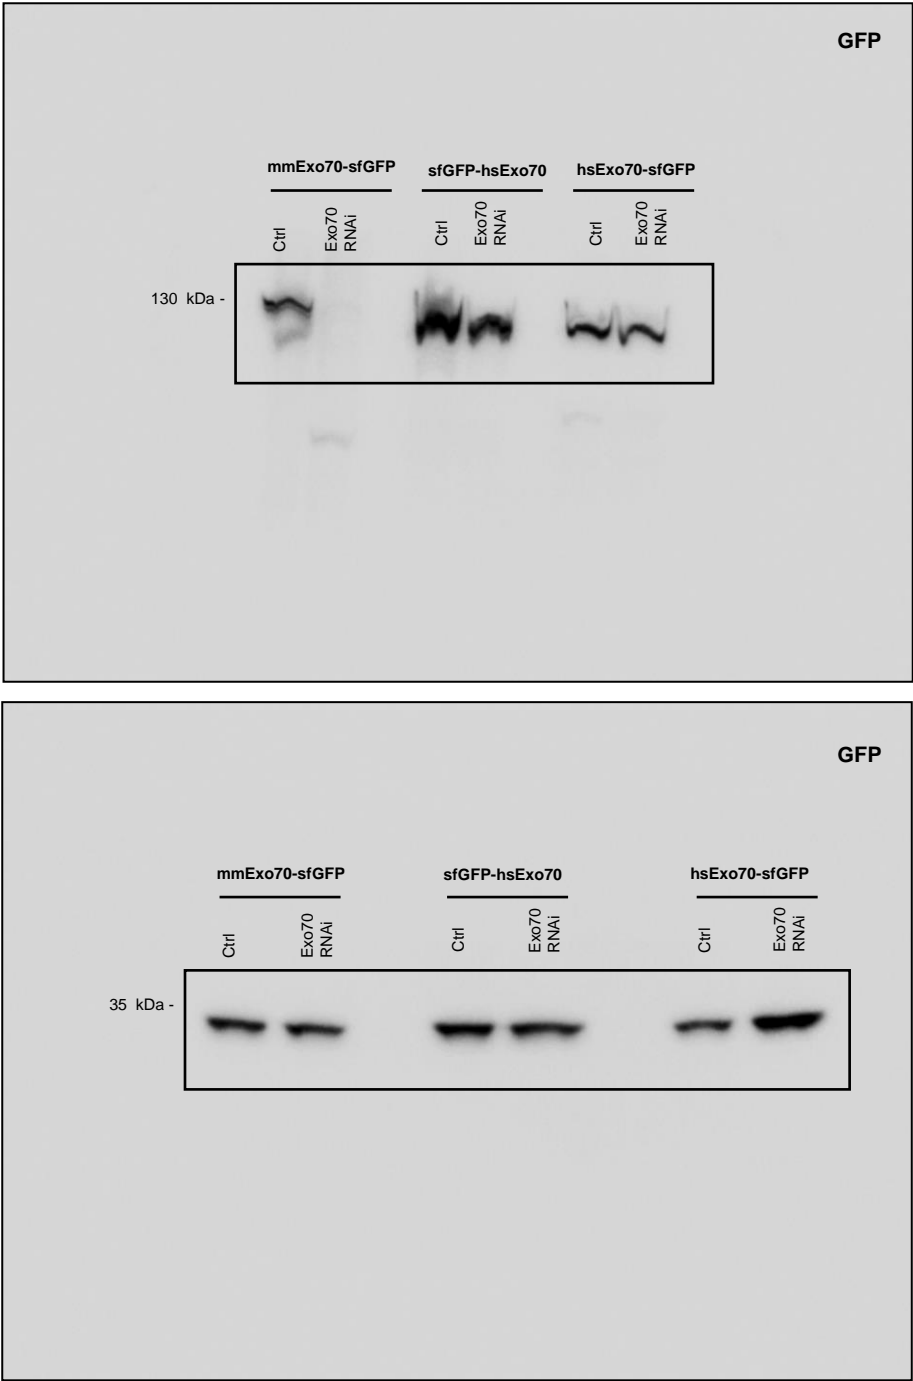

Supplement: inline-supplementary-material-4 [file inline-supplementary-material-4.pdf]
